# Supplementary material
Source: publisher site journal article supplement (https://www.dovepress.com/article/402249)
Supplement: Supplementary file 1 [file get_supplementary_file.php]

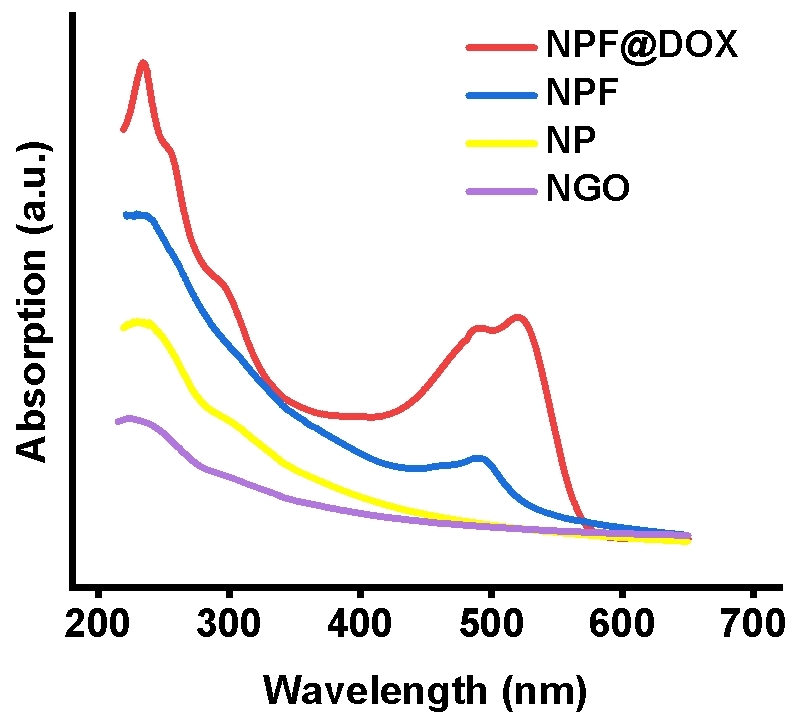


**Figure S1.** UV–Vis spectra of NGO, NP, NPF, and NPF@DOX nanocarriers.


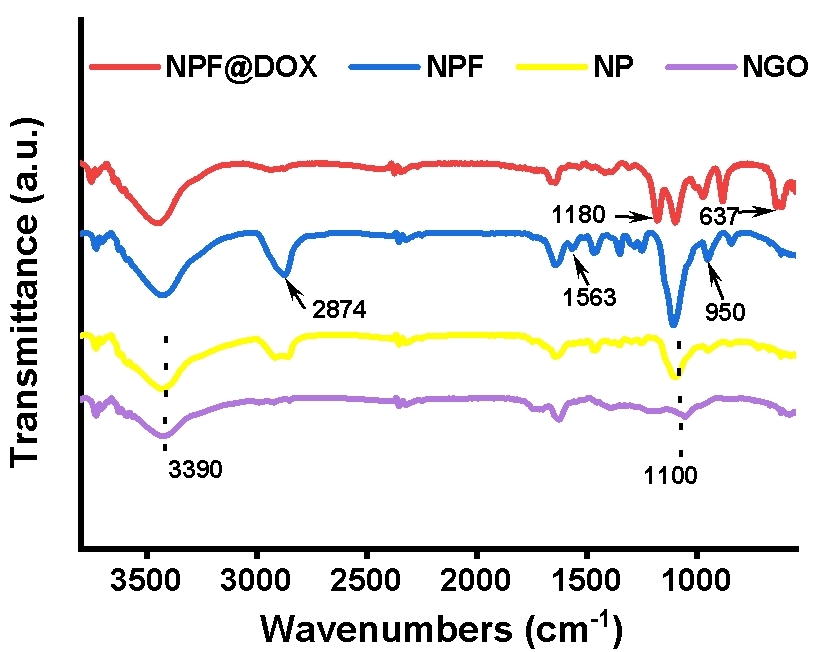


**Figure S2**. Fourier-transform infrared spectra of NGO, NP, NPF, and NPF@DOX nanocarriers.


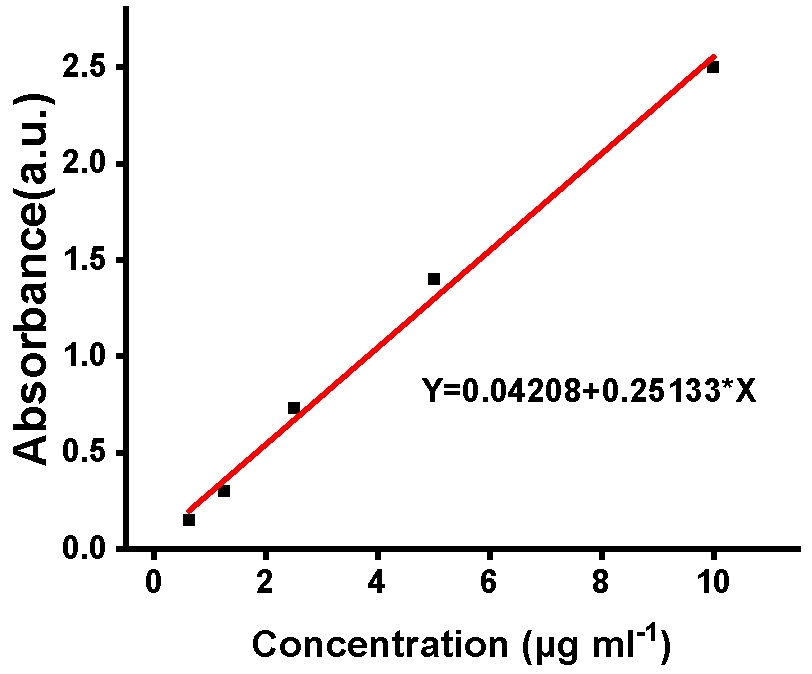


**Figure S3**.The standard DOX curve.


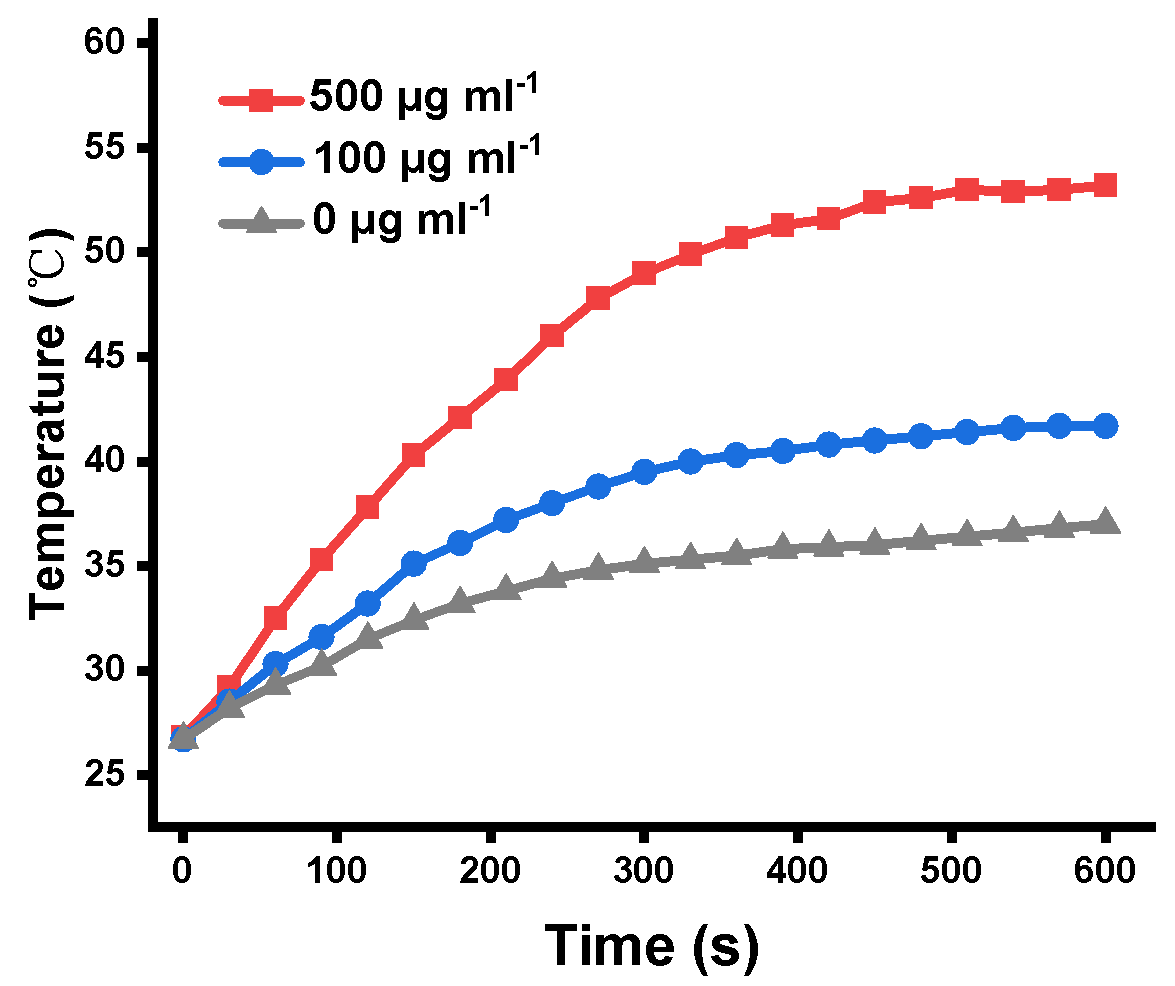


**Figure S4**.Photothermal curves and photos of NPF@DOX at different doses after 808 nm irradiation (1.0 W/cm2).


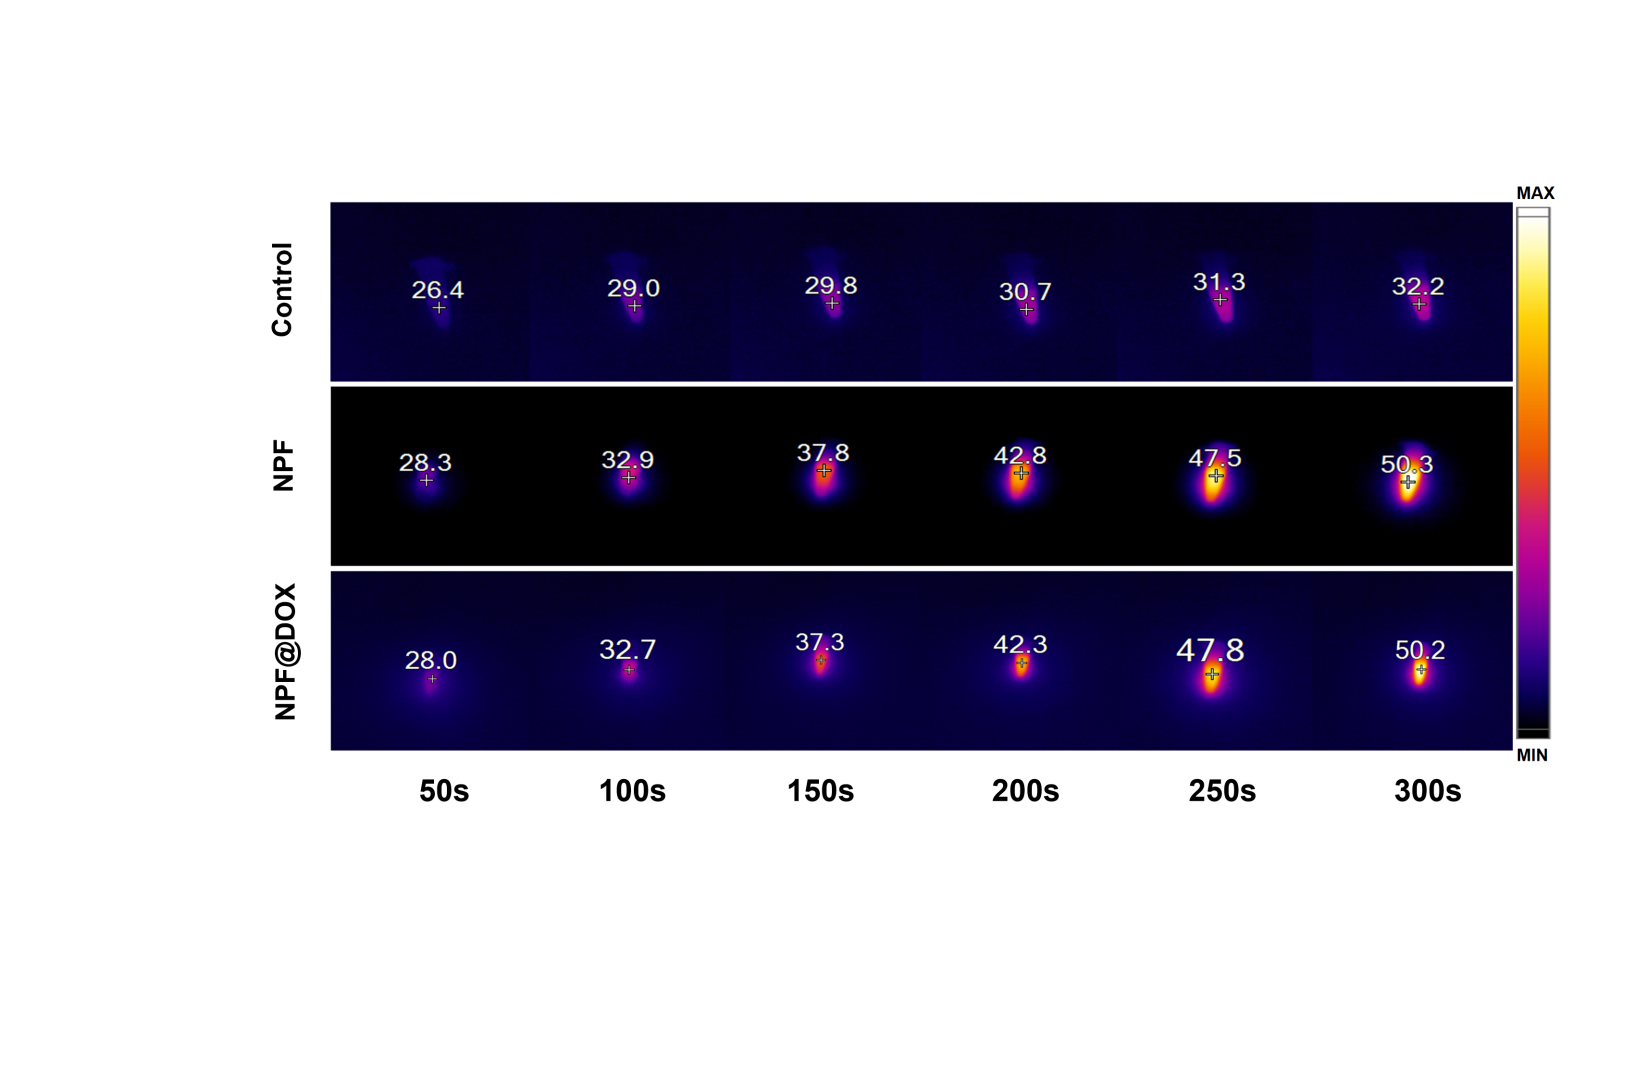


**Figure S5**. Photothermal infrared thermography of NPF@DOX and NS after 808 nm irradiation (1.0 W/cm2, 5 min).


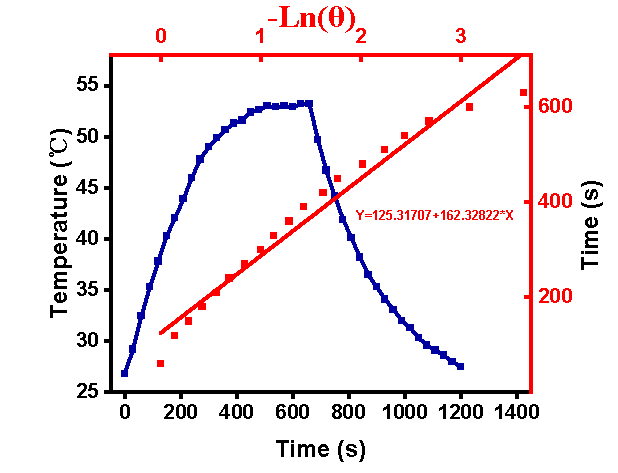


**Figure** **S6**. Photothermal performance of NPF@DOX while cooling to room temperature with linear analysis.


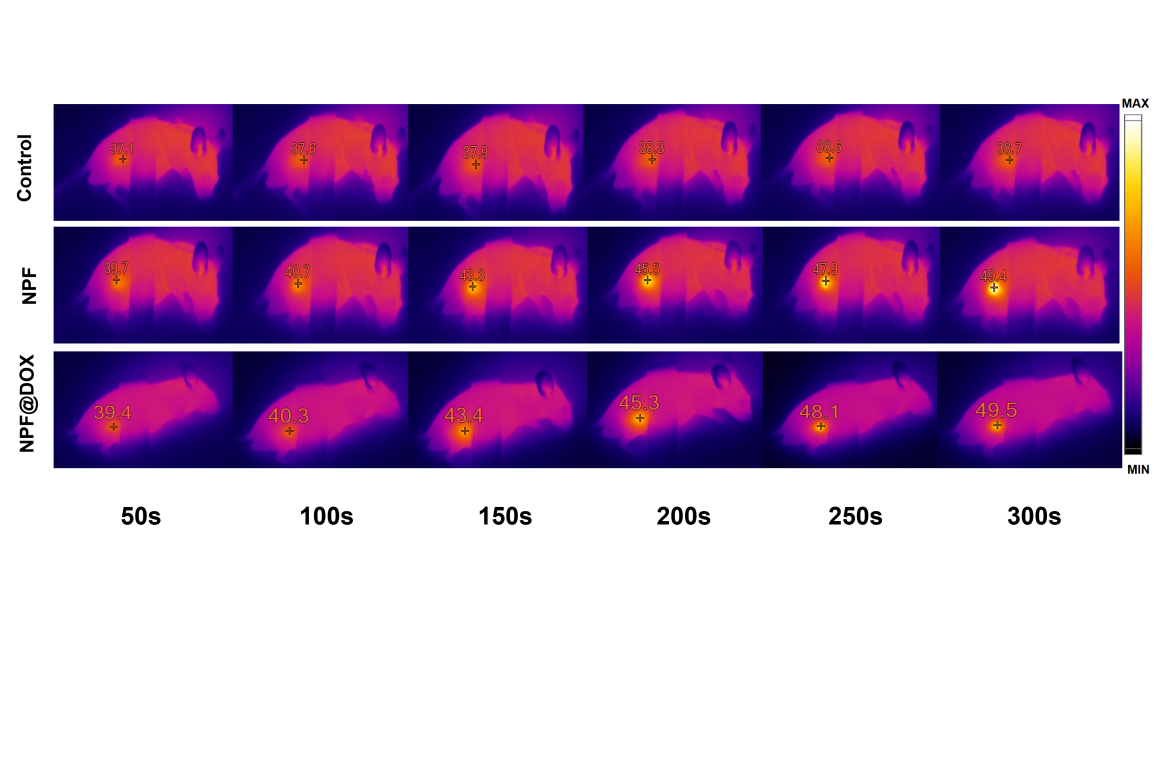


**Figure S7**. CAL-27 tumor-bearing mice were intravenously injected with either NPF@DOX or NS while being exposed to 808 nm irradiation (1.0 W/cm2, 5 min) during photothermal infrared thermography.


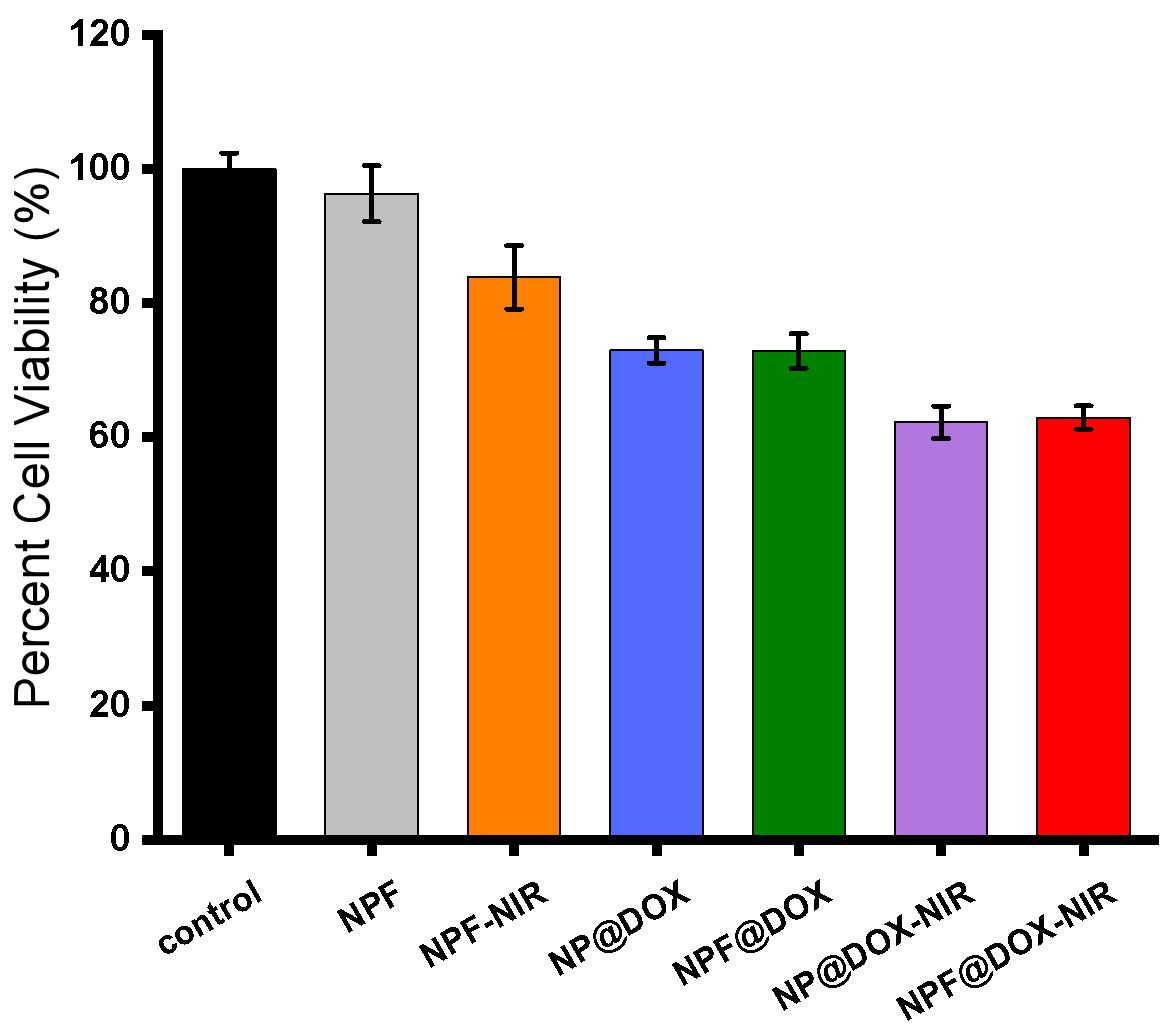


**Figure S 8.** Viability of HOK cells after treatment with control, NPF, NPF-NIR, NP@DOX, NPF@DOX, NP@DOX-NIR, and NPF@DOX-NIR. Data are presented as means ± SD, n=3.
